# Supplementary material for: E-Cigarette Nicotine Delivery Among Young Adults by Nicotine Form, Concentration, and Flavor: A Crossover Randomized Clinical Trial
Source: PubMed Central journal article supplement (PMC11316233; doi:10.1001/jamanetworkopen.2024.26702), 2024-08-09
Supplement: jamanetwopen-e2426702-s002.pdf [file jamanetwopen-e2426702-s002.pdf]

## Supplementary Online Content

Cho YJ, Mehta T, Hinton A, et al. e-Cigarette nicotine delivery among young adults by nicotine form, concentration, and flavor: a crossover randomized clinical trial. *JAMA Netw Open*. 2024;7(8):e2426702. doi:10.1001/jamanetworkopen.2024.26702

**eTable 1.** Ingredients of the Investigational Tobacco Products

**eTable 2.** Theoretical and Measured Ingredients in the Investigational Tobacco Products

**eTable 3.** Participant Characteristics and Tobacco Use History by Preferred Number of Visits

**eTable 4.** Participant Characteristics and Tobacco Use History

**eFigure 1.** Study Device

**eFigure 2.** Study Sequence

**eFigure 3.** Topography During the 30-Minute Ad Libitum Vaping Session BY Nicotine Concentration and Form

**eFigure 4.** Urges and Cravings for Vaping

**eFigure 5.** CONSORT Diagram

**eReference**

This supplementary material has been provided by the authors to give readers additional information about their work.

**Table 1. Ingredients of the Investigational Tobacco Products**

| <b>ITP Name</b> | <b>Dominant Nicotine Form</b> | <b>–(–)Nicotine (mg/g)</b> | <b>Flavoring</b>                   | <b>Benzoic acid (mg/g)</b> | <b>Glycerol (mg/g)</b> | <b>Propylene Glycol (mg/g)</b> |
|-----------------|-------------------------------|----------------------------|------------------------------------|----------------------------|------------------------|--------------------------------|
| T5FB            | Freebase                      | 50                         | Tobacco (Ghost Town <sup>b</sup> ) | None                       | 700                    | 300                            |
| T5NS            | Salt-based <sup>a</sup>       |                            |                                    | 37.65                      |                        |                                |
| T1FB            | Freebase                      | 10                         |                                    | None                       |                        |                                |
| T1NS            | Salt-based                    |                            |                                    | 7.53                       |                        |                                |
| M5FB            | Freebase                      | 50                         | Menthol (Yeti <sup>a</sup> )       | None                       | 700                    | 300                            |
| M5NS            | Salt-based                    |                            |                                    | 37.65                      |                        |                                |
| M1FB            | Freebase                      | 10                         |                                    | None                       |                        |                                |
| M1NS            | Salt-based                    |                            |                                    | 7.53                       |                        |                                |

<sup>a</sup> Nicotine was protonated with a 2% molar excess of benzoic acid

<sup>b</sup> Ghost Town and Yeti are brand names for the ITPs provided to us by Flagship Vapor.

**Table 2. Theoretical and measured ingredients in the investigational tobacco products; mean (standard deviation) for replicates (n=3) except for freebase fraction (n=1 pH determination)**

| Sample ID | Nicotine (% w/w) <sup>a,b</sup> |             | Freebase Nicotine (% of Total Nicotine) <sup>c</sup> |          | Propylene Glycol (% w/w) <sup>b</sup> |              | Glycerol (% w/w) <sup>b</sup> |              | Menthol (% w/w) <sup>b</sup> |             |
|-----------|---------------------------------|-------------|------------------------------------------------------|----------|---------------------------------------|--------------|-------------------------------|--------------|------------------------------|-------------|
|           | Theoretical                     | Measured    | Theoretical                                          | Measured | Theoretical                           | Measured     | Theoretical                   | Measured     | Theoretical                  | Measured    |
| T5FB      | 5.00                            | 5.05 (0.02) | 100                                                  | 98.1     | 30.00                                 | 31.35 (0.16) | 60.00                         | 59.53 (0.14) | 0                            | ND          |
| T5NS      | 5.00                            | 4.99 (0.05) | 0                                                    | 0.3      | 30.00                                 | 29.87 (0.20) | 60.00                         | 56.19 (0.37) | 0                            | ND          |
| T1FB      | 1.00                            | 0.97 (0.00) | 100                                                  | 94.3     | 30.00                                 | 32.52 (0.12) | 60.00                         | 61.71 (0.48) | 0                            | ND          |
| T1NS      | 1.00                            | 0.97 (0.00) | 0                                                    | 0.2      | 30.00                                 | 32.16 (0.13) | 60.00                         | 60.44 (0.22) | 0                            | ND          |
| M5FB      | 5.00                            | 5.09 (0.02) | 100                                                  | 98.6     | 30.00                                 | 28.63 (0.10) | 60.00                         | 59.96 (0.18) | 1.00                         | 0.93 (0.00) |
| M5NS      | 5.00                            | 5.05 (0.02) | 0                                                    | 0.2      | 30.00                                 | 27.17 (0.14) | 60.00                         | 56.74 (0.22) | 1.00                         | 0.83 (0.00) |
| M1FB      | 1.00                            | 1.01 (0.00) | 100                                                  | 95.7     | 30.00                                 | 29.88 (0.22) | 60.00                         | 62.45 (0.20) | 1.00                         | 0.97 (0.00) |
| M1NS      | 1.00                            | 0.98 (0.00) | 0                                                    | 0.3      | 30.00                                 | 29.47 (0.08) | 60.00                         | 61.55 (0.26) | 1.00                         | 0.70 (0.03) |

<sup>a</sup> % (w/w) = weight of chemical / weight of e-liquid.

<sup>b</sup> Analyzed using quantitative nuclear magnetic resonance as described in Crenshaw et al., 2016.<sup>1</sup>

<sup>c</sup> 10g of HPLC grade deionized water was added to 1g of e-liquid solution. The mixture was stirred for 15 minutes and the pH was measured. The freebase fraction was calculated using the Henderson-Hasselbalch equation.

ND = not detected

**eTable 3. Participant Characteristics and Tobacco Use History by Number of Visit Preference**

|                                               | <b>5 Visits</b><br>(n=21) | <b>9 Visits</b><br>(n=66) |         |
|-----------------------------------------------|---------------------------|---------------------------|---------|
|                                               | Mean (SD) or No.<br>(%)   | Mean (SD) or No.<br>(%)   | p-value |
| Age                                           | 21.9 (1.0)                | 22.5 (1.4)                | 0.05    |
| Female sex assigned at birth                  | 12 (57.1%)                | 39 (59.1%)                | 0.87    |
| Race/ethnicity <sup>a</sup>                   |                           |                           | 0.91    |
| Hispanic                                      | 1 (4.8%)                  | 5 (7.6%)                  |         |
| Non-Hispanic Black                            | 1 (4.8%)                  | 3 (4.6%)                  |         |
| Non-Hispanic White                            | 16 (76.2%)                | 52 (78.8%)                |         |
| Other (e.g., multiple races)                  | 3 (14.3%)                 | 6 (9.1%)                  |         |
| E-cigarette use characteristics               |                           |                           |         |
| Days of use during the past 30 days           | 28.6 (3.2)                | 27.0 (6.8)                | 0.71    |
| Years of regular e-cigarette use <sup>b</sup> | 3.4 (2.2)                 | 3.3 (2.1)                 | 0.74    |
| Current regular e-cigarette use <sup>b</sup>  | 21 (100.0%)               | 63 (96.9%)                | 1.00    |
| Average Puffs per Day                         | 68.8 (42.3)               | 82.8 (104.6)              | 0.74    |
| Flavor <sup>c</sup>                           |                           |                           | 0.38    |
| Tobacco                                       | 0 (0.0%)                  | 0 (0.0%)                  |         |
| Menthol or Mint                               | 10 (47.6%)                | 24 (36.9%)                |         |
| Other flavor                                  | 11 (52.4%)                | 41 (63.1%)                |         |
| Nicotine Form <sup>c</sup>                    |                           |                           | 0.59    |
| Nicotine Salts                                | 15 (71.4%)                | 51 (77.3%)                |         |
| Unknown                                       | 6 (28.6%)                 | 15 (22.7%)                |         |
| Nicotine Concentration, % <sup>c</sup>        |                           |                           |         |
| Other tobacco use characteristics             |                           |                           |         |
| Ever smoking of a cigarette                   | 20 (95.2%)                | 55 (83.3%)                | 0.28    |
| Ever regular cigarette smoking <sup>a</sup>   | 4 (19.1%)                 | 16 (24.6%)                | 0.77    |
| Ever use of a cigar                           | 14 (66.7%)                | 31 (47.7%)                | 0.13    |
| Ever use of a pipe                            | 5 (23.8%)                 | 11 (16.9%)                | 0.52    |
| Ever use of cigarillos                        | 5 (23.8%)                 | 30 (46.2%)                | 0.07    |
| Ever use of little cigars                     | 2 (9.5%)                  | 7 (10.8%)                 | 1.00    |
| Ever use of smokeless tobacco                 | 5 (23.8%)                 | 17 (26.2%)                | 0.83    |
| Ever use of snus                              | 0 (0.0%)                  | 6 (9.2%)                  | 0.33    |
| Ever use of hookah                            | 11 (52.4%)                | 36 (55.4%)                | 0.81    |

<sup>a</sup>Ethnicity was self-reported as ‘Hispanic or Latino’ or ‘Not Hispanic or Latino’. Race was self-reported as ‘American Indian/Alaskan Native,’ ‘Asian,’ ‘Black or African American,’ ‘Native Hawaiian or Other Pacific Islander,’ ‘White or Caucasian,’ and ‘Other,’ with multiple choices allowed. The ‘Other’ category includes non-Hispanic American Indian, Asian, and Pacific Islander. <sup>b</sup>The regular use of a product was defined as using it for at least once a week, for at least a month. <sup>c</sup>Characteristics of e-liquids brought to visit 1. The research staff determined the nicotine form by examining pictures of the participants’ usual e-cigarette brands. Brands using cartridges or pods filled with nicotine salts, such as JUUL, Hyde, Elf bar and Breeze Pro, were categorized as nicotine salts, whereas devices designed for user-supplied e-liquid, such as Vapresso and Caliburn, were categorized as unknown.

**eTable 4. Participant Characteristics and Tobacco Use History**

|                                               | All Enrolled<br>(n=87)  | Used<br>study e-liquids <sup>a</sup><br>(n=72) | Did not use<br>study e-liquids <sup>a</sup><br>(n=15) | p-value |
|-----------------------------------------------|-------------------------|------------------------------------------------|-------------------------------------------------------|---------|
|                                               | Mean (SD) or No.<br>(%) | Mean (SD) or No.<br>(%)                        | Mean (SD) or No.<br>(%)                               |         |
| Age                                           | 22.4 (1.4)              | 22.4 (1.4)                                     | 22.3 (1.1)                                            | 0.78    |
| Female sex assigned at birth                  | 51 (58.6%)              | 42 (58.3%)                                     | 9 (60.0%)                                             | 0.91    |
| Race/ethnicity <sup>b</sup>                   |                         |                                                |                                                       | 0.77    |
| Hispanic                                      | 6 (6.9%)                | 6 (8.3%)                                       | 0 (0.0%)                                              |         |
| Non-Hispanic Black                            | 4 (4.6%)                | 3 (4.2%)                                       | 1 (6.7%)                                              |         |
| Non-Hispanic White                            | 68 (78.2%)              | 55 (76.4%)                                     | 13 (86.7%)                                            |         |
| Other (e.g., multiple races)                  | 9 (10.3%)               | 8 (11.1%)                                      | 1 (6.7%)                                              |         |
| E-cigarette use characteristics               |                         |                                                |                                                       |         |
| Days of use during the past 30 days           | 27.4 (6.2)              | 27.4 (6.2)                                     | 27.4 (6.1)                                            | 0.88    |
| Years of regular e-cigarette use <sup>c</sup> | 3.3 (2.1)               | 3.3 (2.2)                                      | 3.2 (1.6)                                             | 0.88    |
| Current regular e-cigarette use <sup>c</sup>  | 84 (97.7%)              | 71 (98.6%)                                     | 13 (92.9%)                                            | 0.30    |
| Average Puffs per Day                         | 79.4 (93.4)             | 85.8 (101.0)                                   | 48.9 (26.4)                                           | 0.09    |
| Flavor <sup>d</sup>                           |                         |                                                |                                                       | 0.13    |
| Tobacco                                       | 0 (0.0%)                | 0 (0.0%)                                       | 0 (0.0%)                                              |         |
| Menthol or Mint                               | 34 (39.5%)              | 31 (43.1%)                                     | 3 (21.4%)                                             |         |
| Other flavor                                  | 52 (60.5%)              | 41 (56.9%)                                     | 11 (78.6%)                                            |         |
| Nicotine Form <sup>d</sup>                    |                         |                                                |                                                       | 1.00    |
| Nicotine Salts                                | 66 (75.9%)              | 54 (75.0%)                                     | 12 (80.0%)                                            |         |
| Unknown                                       | 21 (24.1%)              | 18 (25.0%)                                     | 3 (20.0%)                                             |         |
| Nicotine Concentration, % <sup>c</sup>        | 4.4 (1.3)               | 4.5 (1.2)                                      | 4.2 (1.5)                                             | 0.53    |
| Other tobacco use characteristics             |                         |                                                |                                                       |         |
| Ever smoking of a cigarette                   | 75 (86.2%)              | 64 (88.9%)                                     | 11 (73.3%)                                            | 0.21    |
| Ever regular cigarette smoking <sup>c</sup>   | 20 (23.3%)              | 17 (23.6%)                                     | 3 (21.4%)                                             | 1.00    |
| Ever use of a cigar                           | 45 (52.3%)              | 39 (54.2%)                                     | 6 (42.9%)                                             | 0.56    |
| Ever use of a pipe                            | 16 (18.6%)              | 15 (20.8%)                                     | 1 (7.1%)                                              | 0.45    |
| Ever use of cigarillos                        | 35 (40.7%)              | 30 (41.7%)                                     | 5 (35.7%)                                             | 0.77    |
| Ever use of little cigars                     | 9 (10.5%)               | 9 (12.5%)                                      | 0 (0.0%)                                              | 0.34    |
| Ever use of smokeless tobacco                 | 22 (25.6%)              | 19 (26.4%)                                     | 3 (21.4%)                                             | 1.00    |
| Ever use of snus                              | 6 (7.0%)                | 6 (8.3%)                                       | 0 (0%)                                                | 0.58    |
| Ever use of hookah                            | 47 (54.7%)              | 39 (54.2%)                                     | 8 (57.1%)                                             | 1.00    |
| Number of Visits                              |                         |                                                |                                                       | 0.51    |
| 5 Visits                                      | 21 (24.1%)              | 19 (26.4%)                                     | 2 (13.3%)                                             |         |
| 9 Visits                                      | 66 (75.9%)              | 53 (73.6%)                                     | 13 (86.7%)                                            |         |

<sup>a</sup>72 participants completed the second visit and used at least one study e-liquid, comprising the analytic sample. 15 participants completed only a baseline visit and did not try any study e-liquids. <sup>b</sup>Ethnicity was self-reported as 'Hispanic or Latino' or 'Not Hispanic or Latino'. Race was self-reported as 'American Indian/Alaskan Native,' 'Asian,' 'Black or African American,' 'Native Hawaiian or Other Pacific Islander,' 'White or Caucasian,' and 'Other,' with multiple choices allowed. The 'Other' category includes non-Hispanic American Indian, Asian, and Pacific Islander. <sup>c</sup>The regular use of a product was defined as using it for at least once a week, for at least a month. <sup>d</sup>Characteristics of e-liquids brought to visit 1. The research staff determined the nicotine form by examining pictures of the participants' usual e-cigarette brands. Brands using cartridges or pods filled with nicotine salts, such as JUUL, Hyde, Elf bar and Breeze Pro, were categorized as nicotine salts, whereas devices designed for user-supplied e-liquid, such as Vaporesso and Caliburn, were categorized as unknown.

*eFigure 1. Study device (Evolv Reflex)*

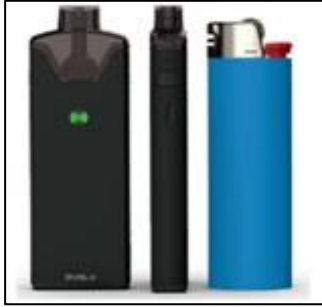

The Evolv Reflex was selected for its ability to vape lab-prepared e-liquids and its design similarity to currently available cartridge/pod type e-cigarette devices. The device has been fully characterized and includes puff actuation, 750 mAh battery, 3-25 watt range, 0.5 ohm coil resistance, and 2 mL pod capacity. Emissions testing demonstrated that its nicotine yield under normal use conditions was comparable to typical cigarette yields.

*eFigure 2. Study sequence*

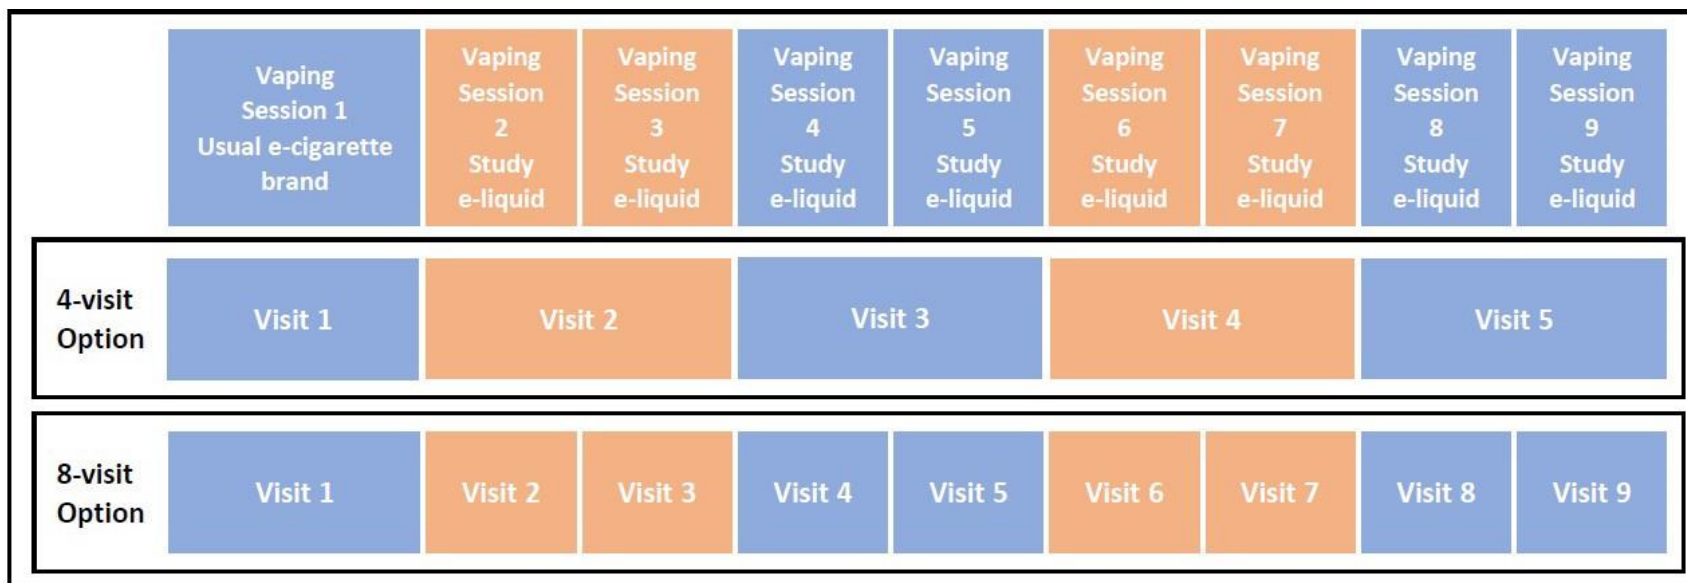

Note: Participants were required to abstain from nicotine for at least 12 hours before each study visit, with visits separated by a minimum of 48 hours. During the first visit, participants used their usual brand of e-cigarettes. Participants were then given two options for completing the subsequent eight vaping sessions: either in four or eight lab visits based on their preference. For these sessions, the Evolv Reflex e-cigarette device was used, which was set to a constant constant wattage of 8W, and prefilled with one of the eight study e-liquids. The e-liquids varied in nicotine form (freebase vs. salt-based nicotine), nicotine concentration (1% vs. 5% w/w), and flavor (menthol vs. tobacco) and were administered in a randomly assigned order.

**eFigure 3. Topography during the 30-minute ad libitum vaping session by nicotine concentration and form.**

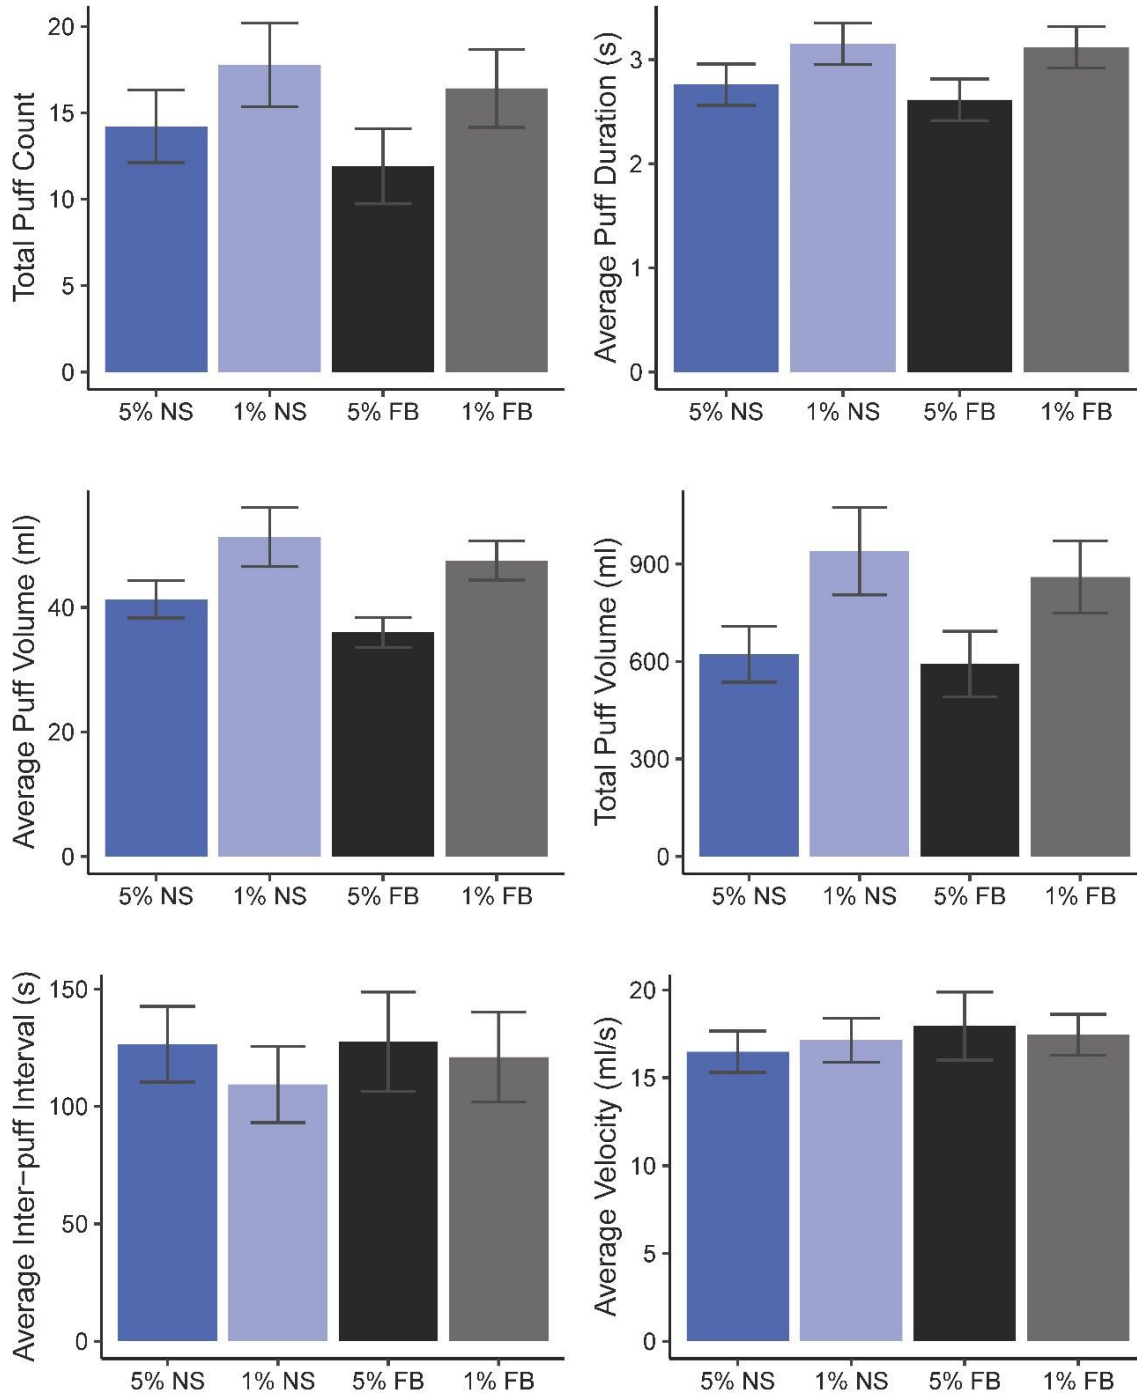

VAS: visual analog scale; NS: nicotine salts; FB: freebase nicotine. The boxes represent the means, and the lines represent the 95% confidence intervals. The unit measures were n for total puff count, seconds for average puff duration, and milliliters (ml) for the average puff volume and total puff volume.



eFigure 4. Urges and cravings for vaping

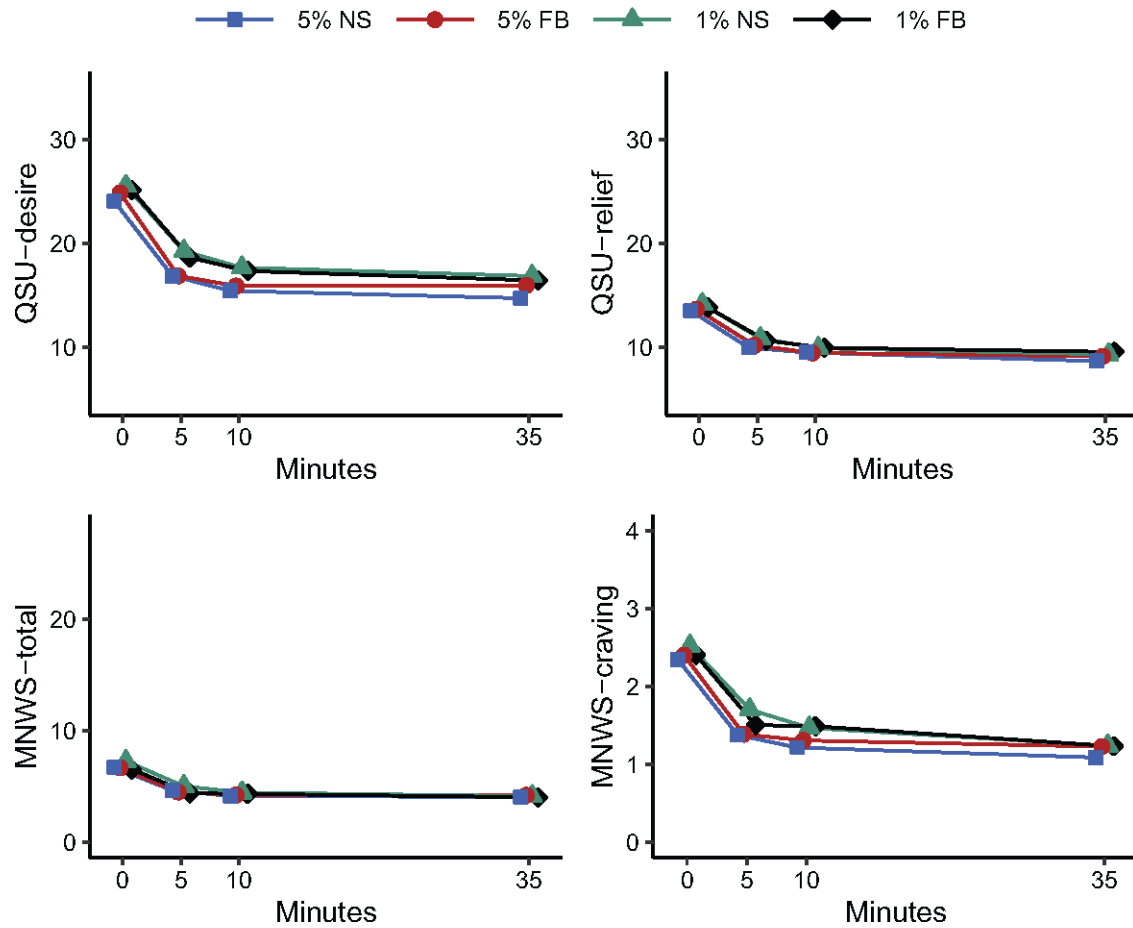

QSU: Questionnaire of Smoking Urges; MNWS: Minnesota Nicotine Withdrawal Scale. QSU-desire and QSU-relief ranged from 1 to 35. MNWS-total ranged from 0 to 32. MNWS-craving ranged from 0 to 4.

**eFigure 5. CONSORT diagram**

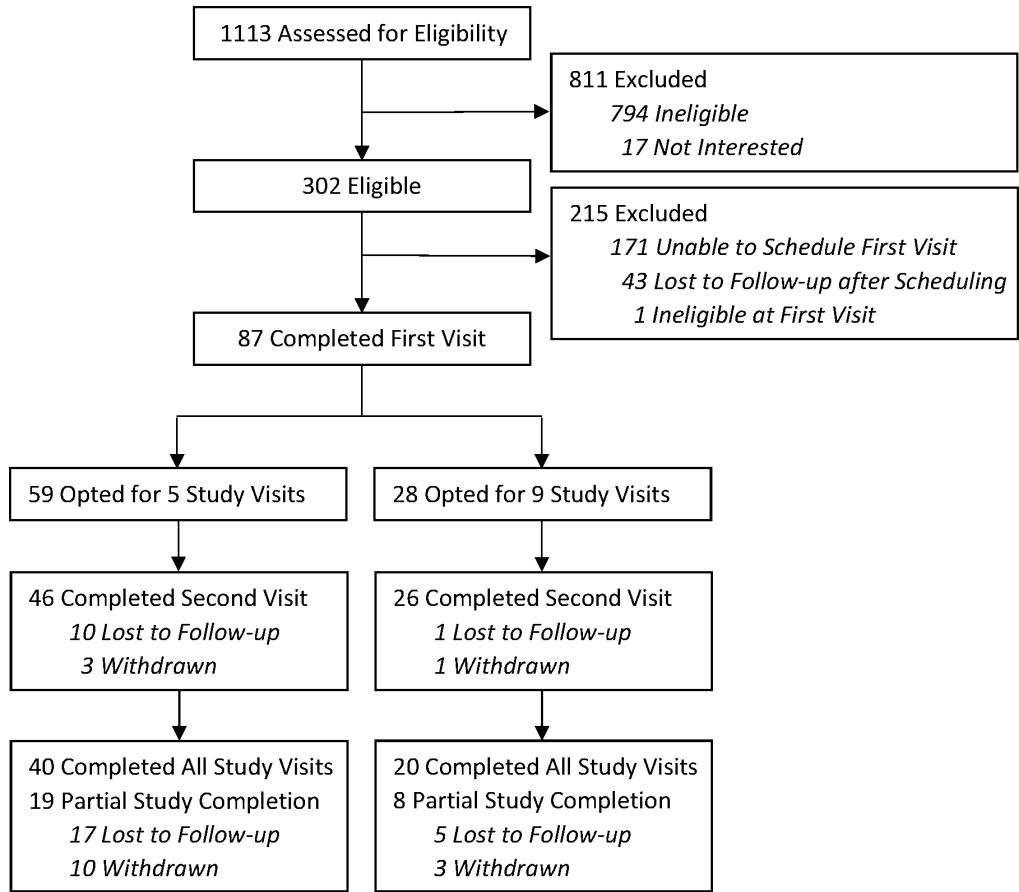

## eReference

1. Crenshaw MD, Tefft ME, Buehler SS, Brinkman MC, Clark PI, Gordon SM. Determination of nicotine, glycerol, propylene glycol and water in electronic cigarette fluids using quantitative (1) H NMR. *Magn Reson Chem*. Nov 2016;54(11):901-904. doi:10.1002/mrc.4498
