# Supplementary material for: E-Cigarette Nicotine Delivery Among Young Adults by Nicotine Form, Concentration, and Flavor: A Crossover Randomized Clinical Trial
Source: PubMed Central journal article supplement (PMC11316233; doi:10.1001/jamanetworkopen.2024.26702), 2024-08-09
Supplement: jamanetwopen-e2426702-s003.pdf [file jamanetwopen-e2426702-s003.pdf]

## Data Sharing Statement

Cho. e-Cigarette Nicotine Delivery Among Young Adults by Nicotine Form, Concentration, and Flavor. *JAMA Netw Open*. Published August 09, 2024.  
doi:10.1001/jamanetworkopen.2024.26702

### Data

**Data available:** No
